# Supplementary material for: The Presence of Two MyoD Genes in a Subset of Acanthopterygii Fish Is Associated with a Polyserine Insert in MyoD1
Source: MDPI journal article supplement (doi:10.3390/jdb11020019), 2023-04-28
Supplement: s1 [file s1]

## SUPPLEMENTAL MATERIAL

**Table S1**

Listed in this table are the sequences (5' to 3') for primers used for cloning amplification of cDNAs representing *A.alcalica* MyoD1 and MyoD2. Products were cloned into pGEM T-Easy to make antisense cRNA probes for in situ hybridisation analysis.

| Primer sets for generating probes |                                   |
|-----------------------------------|-----------------------------------|
| AaMyoD1 forward                   | 5' CCCACCGCTGATGATTTCTAT 3'       |
| AaMyoD1 reverse                   | 5' GCTTCGTCTTCTGGTTGTCT 3'        |
| AaMyoD2 forward                   | 5' ATGGATCTGTCAGACTTTCCCTTCGTT 3' |
| AaMyoD2 reverse                   | 5' ACAAATGTTGCTGGACTCGGCAGACAG 3' |

**Table S2**

Listed in this table are the sequences (5' to 3') for primers used for cloning full length HA-tagged products that were directionally cloned into the EcoR1 and Xba1 sites in pCS2+ to generate synthetic mRNAs for expression in *Xenopus*.

| Primer sets for overexpression plasmids |                                                                                 |
|-----------------------------------------|---------------------------------------------------------------------------------|
| AaMyoD1 forward                         | 5' AGAGAGGAATTCATGGAGTTGTCGGATATCTCTTTC 3'                                      |
| AaMyoD1-HA reverse                      | 5'AGAGAGTCTAGAAGCATAATCTGGAACATCATATGGATATAGGACTTGGTAAATCAGGTTGGGTCCTGGCTGCC 3' |
| AaMyoD2 forward                         | 5' AGAGAGGAATTCATGGATCTGTCAGACTTTCCCTTCGTT 3'                                   |
| AaMyoD2-HA reverse                      | 5'AGAGAGTCTAGAAGCATAATCTGGAACATCATATGGATAACAAATGTTGCTGGACTCGGCAGACAG 3'         |
| DrMyoD1 forward                         | 5' AGAGAGGAATTCATGGAGTTGTCGGATATCC 5'                                           |
| DrMyoD1-HA reverse                      | 5'AGAGAGTCTAGAAGCATAAATCTGGAACATCATATGGATAAAGCACTTGATAAATGGTTTCC TG 3'          |

**Table S3**

Listed in this table are the sequences (5' to 3') for primers used for qPCR to measure transcriptional activity of MyoD1 proteins in *Xenopus* explants.

| Primer sets for qPCR          |                               |
|-------------------------------|-------------------------------|
| <i>X.laevis</i> act3 forward  | 5' TCACAACAGCTGAAAGGGAGAT 3'  |
| <i>X.laevis</i> act3 reverse  | 5' AAGTCCAGAGCCACATAGGC 3'    |
| <i>X.laevis</i> myh4 forward  | 5' GTGCGTTGTTTGATTCCCAAT 3'   |
| <i>X.laevis</i> myh4 reverse  | 5' GCTGGTGGATGAGGAGATGGT 3'   |
| <i>X.laevis</i> dicer forward | 5' GGCTTTTACACATGCCTCTTACC 3' |
| <i>X.laevis</i> dicer reverse | 5' GTCCAAAATTGCATCTCCAAG 3'   |

## SUPPLEMENTAL FIGURES

|            |       |                                                                |
|------------|-------|----------------------------------------------------------------|
| O.alcalica | myoD1 | MELS....DISFPIP.....TADDFYDDPCFNTSDMHFFEDLDPRLVHVG.LLKP        |
| Danio      | myoD1 | MELS....DIPFPIP.....SADDFYDDPCFNTNDMHFFEDLDPRLVHVS.LLKP        |
| Mouse      | myoD1 | MELLSPPLRDLIDLTPGDGSLCSFETADDFYDDPCFDSFPLDLRFEDLDPRLVHVGALLKPE |
| O.alcalica | myoD1 | DSSSSSSSSPSSSSSSPSSLLHLHHHAEEVDEHVRAPSGHHQAGRCLLWACKACKRKT     |
| Danio      | myoD1 | E.....HHHIE...DEHVRAPSGHHQAGRCLLWACKACKRKT                     |
| Mouse      | myoD1 | E...HAHFST.....AVHFGPGAREDEHVRAPSGHHQAGRCLLWACKACKRKT          |
| O.alcalica | myoD1 | NADRRKAATLRERRRLSKVNDAFETLKRCTTANPNQRLPKVEILRNAISYIESLQALLRG   |
| Danio      | myoD1 | NADRRKAATMRERRRLSKVNDAFETLKRCTSTNPNQRLPKVEILRNAISYIESLQALLRS   |
| Mouse      | myoD1 | NADRRKAATMRERRRLSKVNEAFETLKRCTSSNPNQRLPKVEILRNAIRYIEGLQALLRD   |
| O.alcalica | myoD1 | G.....QEDGFYP.....VLEHYSGSDSASSPLSNCSGDMTDFNGPTCQTTRRRSYD      |
| Danio      | myoD1 | .....QEDNYYP.....VLEHYSGSDSASSPSRNSCSGDMDFMGPTCQTTRRRNSYD      |
| Mouse      | myoD1 | QDAAPPGAAAFYAPGPLPPGRGSEHYSGSDSASSPSRNSCSGMDYSGPPSPGPRRQNGYD   |
| O.alcalica | myoD1 | SSSYFSETPNGGLKLSERSSVSSSLDCLSSIVERISTDN..SSLPPADGPG.SPSTTTTTV  |
| Danio      | myoD1 | SS.YFNDTPNADARNNKNSVSSSLDCLSSIVERISTETPACPVLSVPEGHEESPSPHEG    |
| Mouse      | myoD1 | TA.YYSEAVR.ESRPGKSAAVSSSLDCLSSIVERISTDSFAAPALLLADAPPESEPGPPEG  |
| O.alcalica | myoD1 | P..VGEAGTATATAQVSSPTG..SQDPNLITYQVLI                           |
| Danio      | myoD1 | S..VLSDTGTTAPSTSCPQ...QQAQETIYQVL.                             |
| Mouse      | myoD1 | ASLSDTEQGTQTPSPDAAPQCPAGSNPNAIYQVL.                            |

**Supplemental Figure S1.** Alignment of MyoD1 proteins from *Oreochromis alcalica*, *Danio rerio*, and *Mus musculus* showing highly conserved amino acid sequences in regions known to be essential for transcriptional activity (underlined): the transcriptional activation domain (TAD), Histidine/Cysteine (H/C) rich domain, and the bHLH domain. Residues implicated in protein stability are also conserved across the MyoD1 proteins and highlighted: putative phosphorylation targets of proline directed kinases (SP); Lysine (K) substrates for ubiquitin ligase; Tyrosines (Y) that can be targets of the kinase MEK1. Two additional sites for proline directed phosphorylation are found in the poly serine domain in *O.alcalica* MyoD1.

Amazon\_molly\_Poecilia\_formosa  
Ballan wrasse Labrus bergylta  
Barramundi\_perch Lates calcarifer  
Bicolor\_damselfish Stegastes partitus  
Bluntnouted clingfish Gouania willdeno  
Burtons\_mouthbrooder Haplochromis burto  
Channel\_bull\_blenny Cottoperca gobio  
Climbing\_perch Anabas testudineus  
Clown\_anemonefish Amphiprion ocellaris  
Eastern\_happy\_Astatotilapia\_Galliptera  
Greater\_amberjack\_Seriola dumerili  
Indian\_glassy\_fish Parambassis ranga  
Indian\_medaka Oryzias melastigma  
Japanese\_medaka Oryzias latipes  
Large\_yellow\_croaker Larimichthys croce  
Lyretail\_cichlid Neolamprologus brichar  
Makobe\_Island\_cichlid Pundamilia nyerere  
Midas\_cichlid Amphiprophus citrinellus  
Mummichog Fundulus heteroclitus  
Ocean\_sunfish Mola mola  
Orange\_clownfish Amphiprion percula  
Oreochromis Alcolapia alcalica  
Platyfish Xiphophorus maculatus  
Sheepshead\_minnow Cyprinodon variegatus  
Shortfin\_molly Poecilia mexicana  
Siamese\_fighting\_fish Betta splendens  
Swamp\_eel Monopterus albus  
Tetraodon Tetraodon nigroviridis  
Tilapia Oreochromis niloticus  
Tongue\_sole Cynoglossus semilaevis  
Western\_mosquitofish Gambusia affinis  
Zebra mbuna Maylandia zebra

**Supplemental Figure S2.** Alignment of polyserine insert regions from multiple teleost MyoD1 proteins. The grey region is conserved in all vertebrate MyoD1 sequences as part of the N-terminal activation domain. The Histidine highlighted in green indicates the beginning of the H/C rich region, where conservation with all vertebrate MyoD1 proteins is re-established. Potential sites for proline directed kinase activity are indicated in yellow.

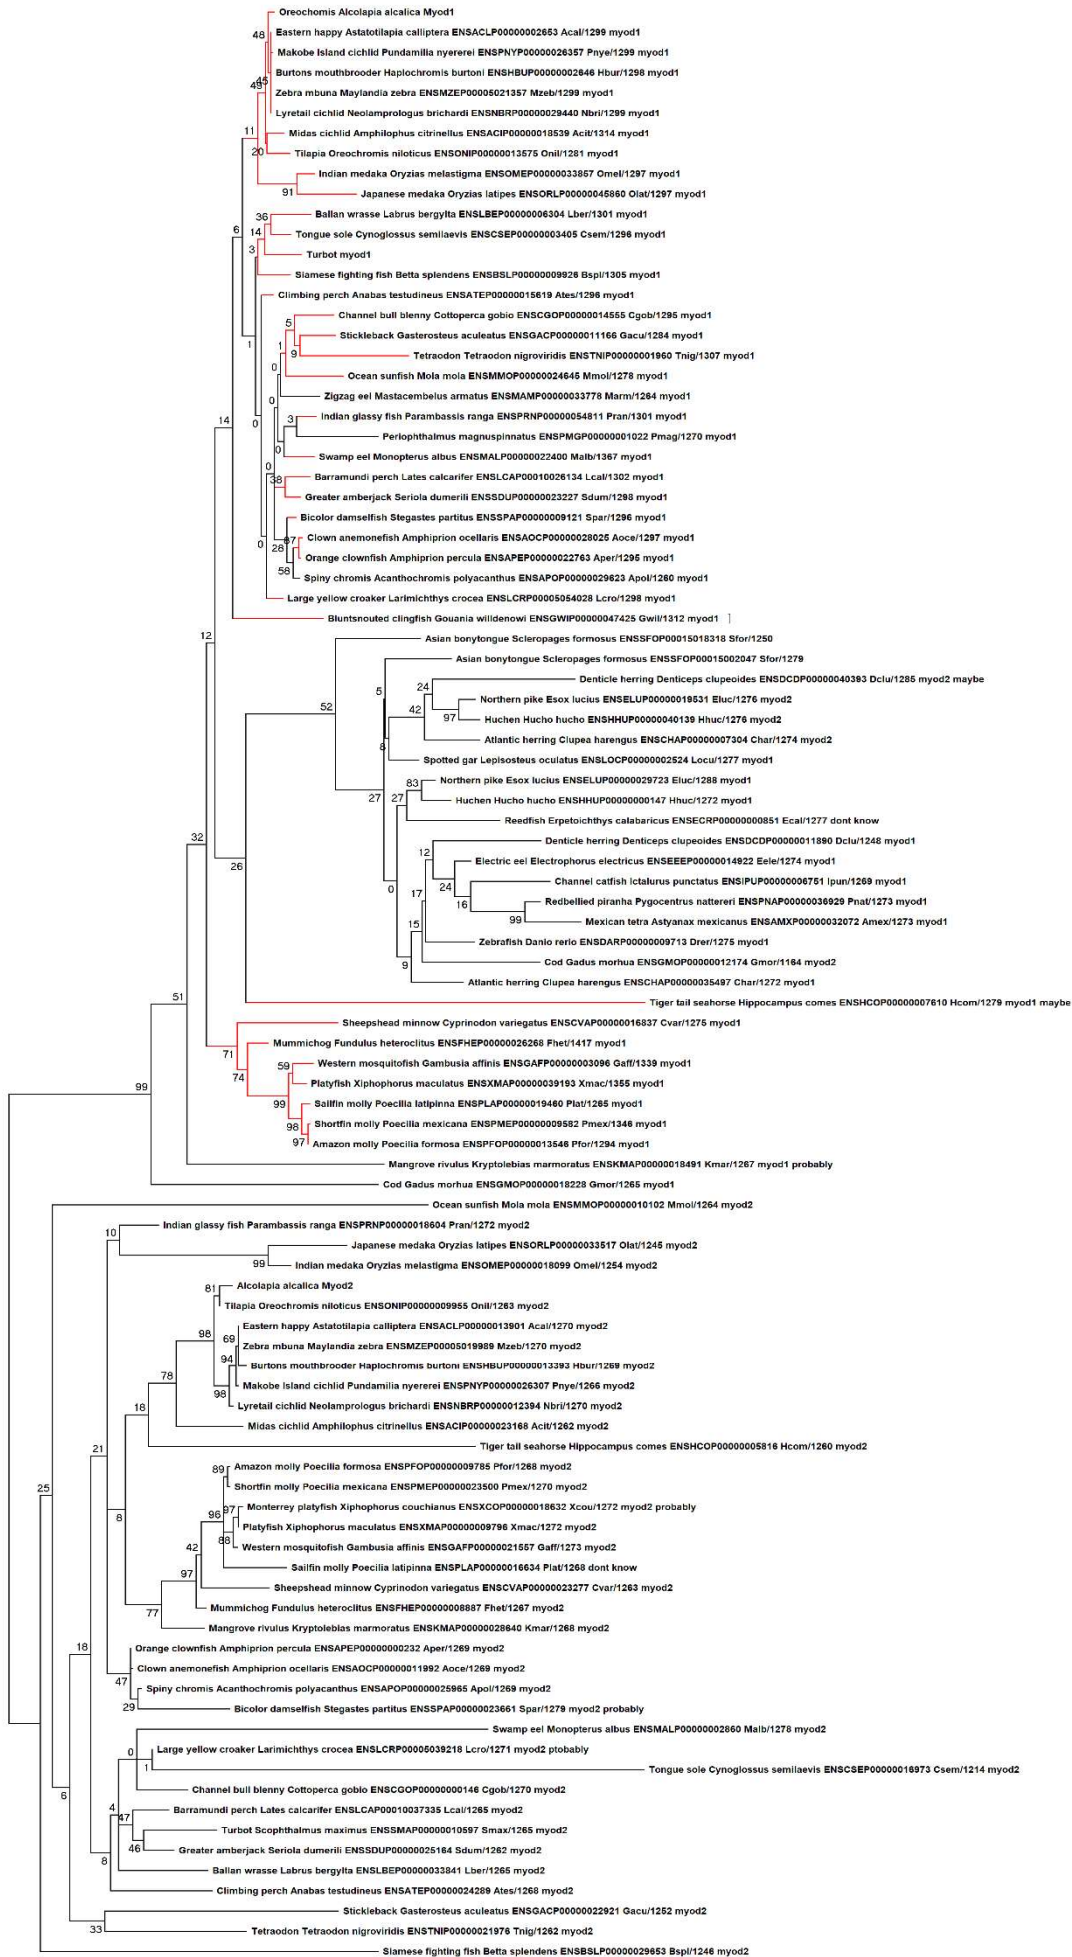

0.5

**Supplemental Figure S3 (previous page).** Phylogenetic tree derived from the analysis of the amino acid sequences of 97 teleost MyoD proteins. MyoD1 and MyoD2 proteins were analysed using MEGAX using the JTT w/freq method and gamma distribution. 59 MyoD1 [36 with a poly-serine insertion] and 38 MyoD2 from 54 teleost species clade separately; where MyoD1 containing and not containing a poly-serine insertion clade as MyoD1. Analysis conducted on clades is supported by a bootstrap value of 99, scale bar represents a genetic distance of 0.5 amino acid substitutions per site. Those MyoD1 with a poly serine insertion are indicated by red branches red.

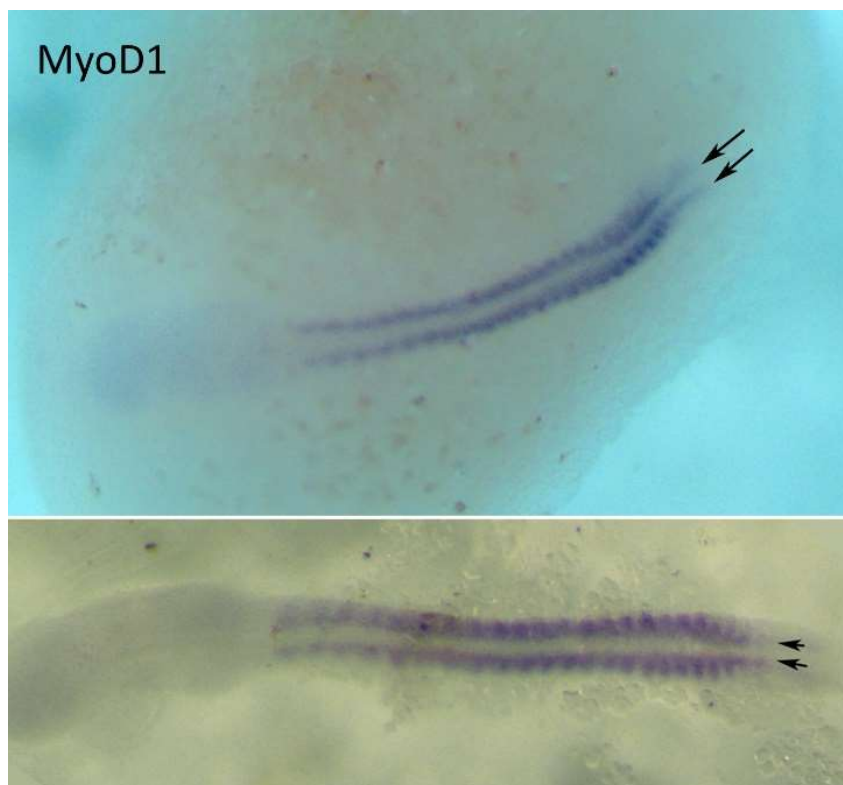

**Supplemental Figure S4.** The expression of *MyoD1* in pre-hatch stage *Oreochromis (Alcolapia) alcalica* embryos. The top panel shows a whole mount in situ hybridisation as a dorsal view, with anterior to the left. The bottom panel is a similar stage embryo as a flat-mount, where the yolk has been removed so the embryo could be flattened to improve visualisation of the posterior expression. The arrows in both panels indicate *MyoD1* expression in the putative adaxial region.



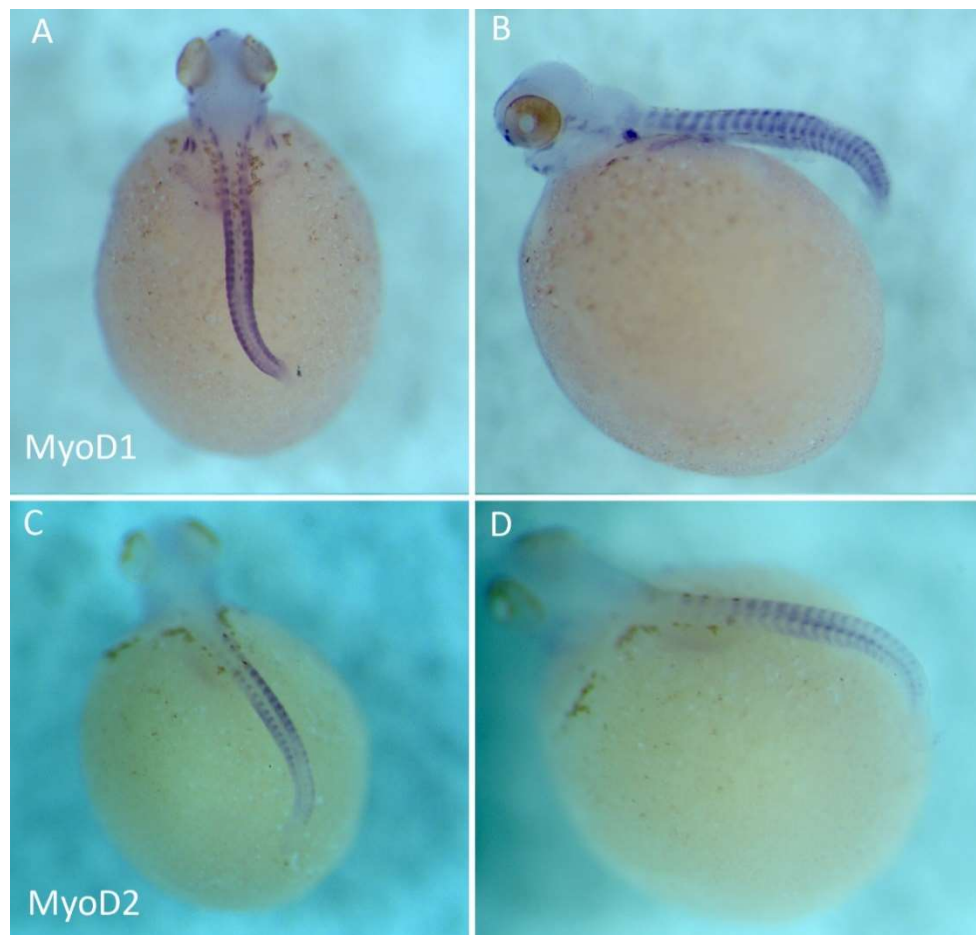

**Supplemental Figure S5.** Expression of MyoD1 (A,B) and MyoD2 (C,D) in stage *Oreochromis (Alcolapia) alcalica* embryos at approximately 3 days post fertilisation. A,C are dorsal views; B,D are lateral views with anterior to the left.
